# Supplementary material
Source: PubMed Central journal article supplement (PMC5712260)
Supplement: NIHMS904278-supplement.pdf [file NIHMS904278-supplement.pdf]

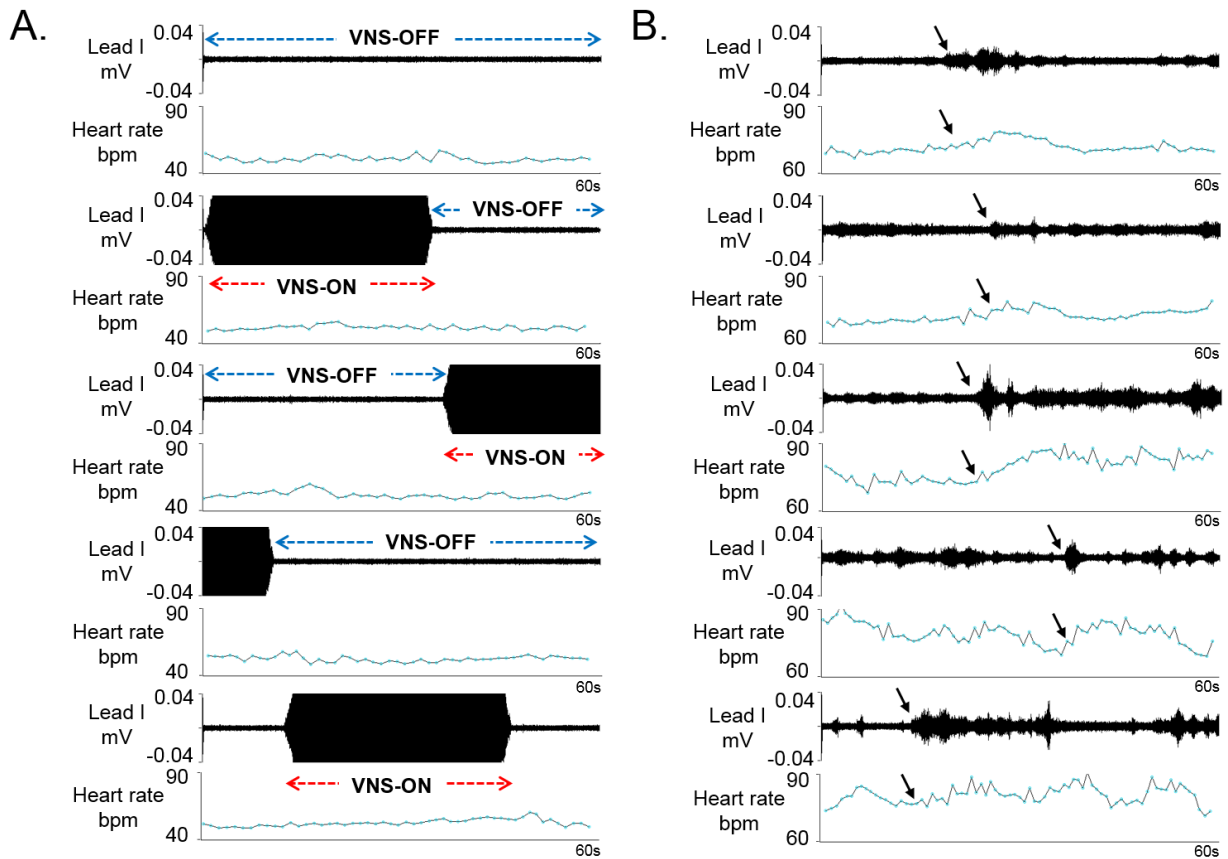

**Supplement Figure 1:** Typical examples of SKNA and heart rate recorded from ECG lead I over a 5-min period in a patient with VNS (A) and in a control patient (B). Both panels were recorded between 8:00 am to 9:00 am. **A** shows SKNA was largely suppressed during VNS-OFF time (blue dotted arrows). There were little heart rate variations. **B** shows SKNA and heart rate from a patient in control group. There were active SKNA episodes associated with heart rate acceleration (arrows). All SKNAs were bandpass filtered between 500 Hz and 1000 Hz.

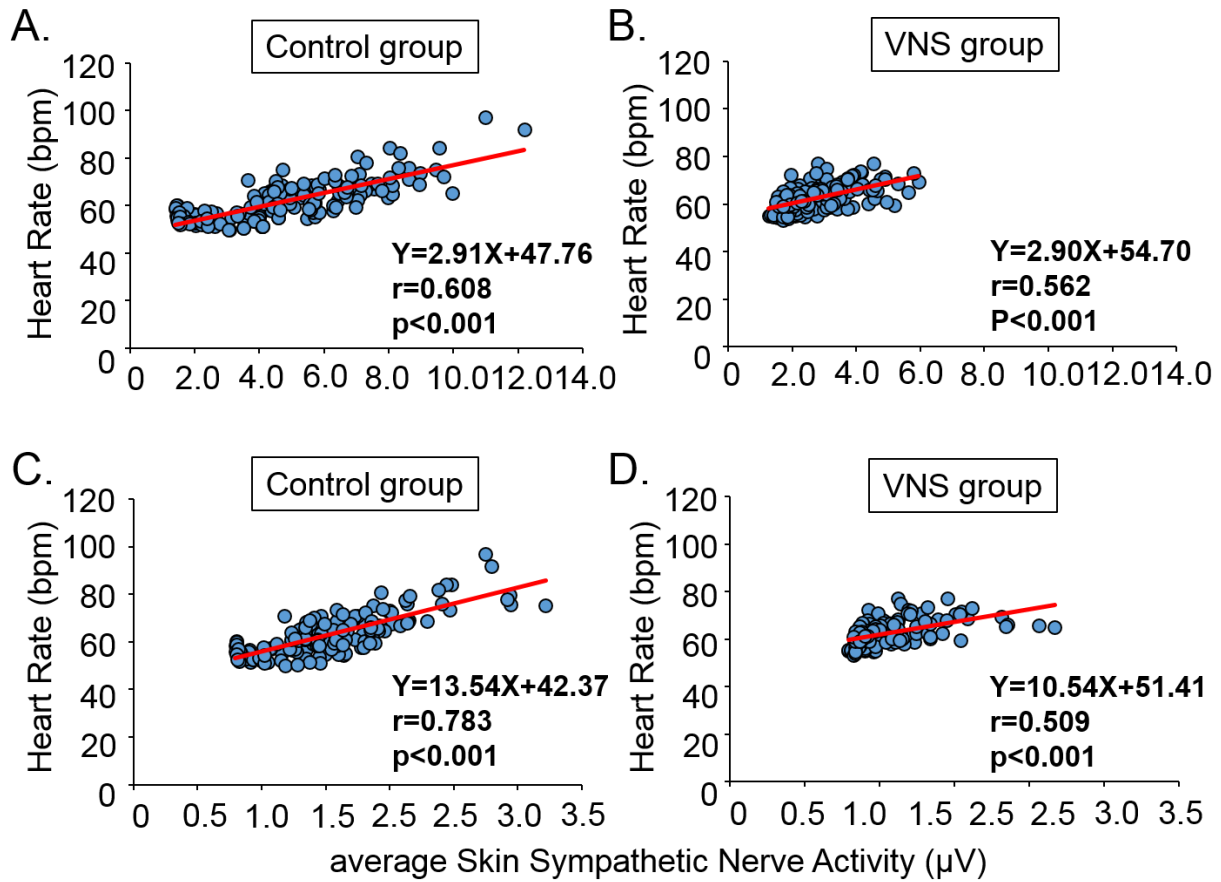

**Supplement Figure 2:** Correlation between average skin sympathetic nerve activity (aSKNA) from Lead I and heart rate in both groups. Each dot represents an averaged value over a 1-min window. **A** and **B** show the aSKNA bandpass filtered between 200 Hz and 1000 Hz. **C** and **D** show the aSKNA bandpass filtered between 500 Hz-1000 Hz filtered. The correlations were better in control group than in the VNS group for both filter settings, reflecting the narrower range of aSKNA and heart rate in the latter group.
